# Supplementary material
Source: publisher figshare collection journal article supplement (https://tandf.figshare.com/ndownloader/files/13174949)
Supplement: Supplementary file 1 [file 13174949]

**Table 1 (Supplementary materials)** – Dosimetric constrains for organs at risk used for SBRT planning [20]. Abbreviations: PRV = planning organ at risk volume, DMAX= maximum dose, VX Gy= volume receiving X Gy.

| **Structure** | **Recommended values for 3 fractions** | **Recommended values for 5 fractions** |
| --- | --- | --- |
| PRV spinal cord | DMAX < 22 Gy | DMAX < 30 Gy |
| V18 Gy < 0.25 cm3 | V22.5 Gy < 0.25 cm3 |
| V11.1 Gy < 1.2 cm3 | V13.5 Gy < 1.2 cm3 |
| Oesophagus | DMAX < 27 Gy | DMAX < 35 Gy |
| V21 Gy < 5 cm3 | V27.5 Gy < 5 cm3 |
| Brachial plexus | DMAX < 24 Gy | DMAX < 32 Gy |
| V22.5 Gy < 3 cm3 | V30 Gy < 3 cm3 |
| Heart | DMAX < 30 Gy | DMAX < 38 Gy |
| V24 Gy < 15 cm3 | V32 Gy < 15 cm3 |
| Large vessels | DMAX < 45 Gy | DMAX < 53 Gy |
| V39 Gy < 10 cm3 | V47 Gy < 10 cm3 |
| Trachea | DMAX < 30 Gy | DMAX < 38 Gy |
| V15 Gy < 4 cm3 | V18 Gy < 4 cm3 |
| Lungs (left+right) | V10.5 Gy < 1500 cm3 | V12.5 Gy < 1500 cm3 |
| V 11.4 Gy < 1000 cm3 | V 13.5 Gy < 1000 cm3 |
